# Supplementary material
Source: publisher figshare collection journal article supplement (https://tandf.figshare.com/ndownloader/files/36011578)
Supplement: Supplementary file 1 [file 36011578]

## Sheet: Sheet1
Table S12：Association analysis between lncRNA and mRNA
lncRNA ID	style	lncRNA	Mrna	style
XM_014867919.1	up	lncRNA	MYF6	up
XM_014828259.1	up	lncRNA	MYF6	up
LNC_027689	up	lncRNA	MYF6	up
LNC_018221	up	lncRNA	NOTCH3	down
LNC_010025	up	lncRNA	TNNT3	down
LNC_004111	up	lncRNA	TNNT3	down
XM_014830371.1	up	lncRNA	TNNT3	down
LNC_016552	up	lncRNA	TNNT3	down
LNC_016551	up	lncRNA	TNNT3	down
XM_014851004.1	up	lncRNA	TNNT3	down
XM_014842086.1	up	lncRNA	MLXIP	down
XM_014860786.1	up	lncRNA	MLXIP	down
LNC_019836	up	lncRNA	MLXIP	down
LNC_020763	up	lncRNA	MLXIP	down
XM_014837349.1	up	lncRNA	MLXIP	down
LNC_029505	up	lncRNA	MLXIP	down
XM_014858483.1	up	lncRNA	MLXIP	down
LNC_008278	down	lncRNA	DCN	up
LNC_008280	down	lncRNA	DCN	up
LNC_027194	down	lncRNA	TPM3	up
LNC_014095	down	lncRNA	SMURF2	up
LNC_023549	down	lncRNA	TMSB4X	down
LNC_026479	down	lncRNA	ETS1	down
LNC_003834	down	lncRNA	CALM2	down
LNC_023499	down	lncRNA	TNNT3	down
LNC_006637	down	lncRNA	TNNT3	down
LNC_031122	down	lncRNA	TNNT3	down
LNC_036211	down	lncRNA	TNNT3	down
LNC_008153	down	lncRNA	TNNT3	down
LNC_009970	down	lncRNA	TNNT3	down
LNC_005816	down	lncRNA	TNNT3	down
LNC_030996	down	lncRNA	TNNT3	down
LNC_032722	down	lncRNA	TNNT3	down
LNC_032723	down	lncRNA	TNNT3	down
LNC_032720	down	lncRNA	TNNT3	down
LNC_032726	down	lncRNA	TNNT3	down
XM_014827316.1	down	lncRNA	TNNT3	down
LNC_034640	down	lncRNA	TNNT3	down
LNC_035297	down	lncRNA	TNNT3	down
LNC_031896	down	lncRNA	TNNT3	down
LNC_024971	down	lncRNA	TNNT3	down
LNC_034401	down	lncRNA	TNNT3	down
LNC_027212	down	lncRNA	TNNT3	down
LNC_026534	down	lncRNA	TNNT3	down
LNC_026538	down	lncRNA	TNNT3	down
LNC_008319	down	lncRNA	TNNT3	down
LNC_021960	down	lncRNA	TNNT3	down
LNC_019672	down	lncRNA	TNNT3	down
XM_014839059.1	down	lncRNA	TNNT3	down
LNC_005935	down	lncRNA	TNNT3	down
LNC_025288	down	lncRNA	TNNT3	down
LNC_020676	down	lncRNA	TNNT3	down
LNC_019904	down	lncRNA	TNNT3	down
LNC_002890	down	lncRNA	TNNT3	down
LNC_026245	down	lncRNA	TNNT3	down
LNC_007047	down	lncRNA	TNNT3	down
XM_014846250.1	down	lncRNA	TNNT3	down
LNC_003552	down	lncRNA	TNNT3	down
LNC_036335	down	lncRNA	TNNT3	down
XM_014842978.1	down	lncRNA	TNNT3	down
XM_014836227.1	down	lncRNA	TNNT3	down
LNC_014200	down	lncRNA	TNNT3	down
LNC_003775	down	lncRNA	TNNT3	down
LNC_030293	down	lncRNA	TNNT3	down
XM_014838052.1	down	lncRNA	TNNT3	down
LNC_027989	down	lncRNA	TNNT3	down
LNC_031204	down	lncRNA	TNNT3	down
LNC_006712	down	lncRNA	TNNT3	down
LNC_005746	down	lncRNA	TNNT3	down
LNC_026537	down	lncRNA	TNNT3	down
LNC_026535	down	lncRNA	TNNT3	down
LNC_031735	down	lncRNA	TNNT3	down
XM_014832939.1	down	lncRNA	TNNT3	down
LNC_011391	down	lncRNA	TNNT3	down
LNC_026479	down	lncRNA	TNNT3	down
LNC_033069	down	lncRNA	TNNT3	down
LNC_027724	down	lncRNA	TNNT3	down
LNC_010075	down	lncRNA	TNNT3	down
LNC_006735	down	lncRNA	TNNT3	down
XM_014850561.1	down	lncRNA	TNNT3	down
LNC_030287	down	lncRNA	TNNT3	down
XM_014848260.1	down	lncRNA	TNNT3	down
LNC_001108	down	lncRNA	TNNT3	down
LNC_031830	down	lncRNA	TNNT3	down
LNC_011341	down	lncRNA	TNNT3	down
LNC_036493	down	lncRNA	TNNT3	down
LNC_016595	down	lncRNA	TNNT3	down
LNC_019801	down	lncRNA	TNNT3	down
LNC_032819	down	lncRNA	TNNT3	down
LNC_036224	down	lncRNA	TNNT3	down
LNC_005867	down	lncRNA	TNNT3	down
LNC_000668	down	lncRNA	TNNT3	down
LNC_031063	down	lncRNA	TNNT3	down
XM_014840027.1	down	lncRNA	TNNT3	down
LNC_031292	down	lncRNA	TNNT3	down
LNC_032179	down	lncRNA	TNNT3	down
XM_014838391.1	down	lncRNA	TNNT3	down
LNC_011503	down	lncRNA	TNNT3	down
LNC_012820	down	lncRNA	TNNT3	down
LNC_007965	down	lncRNA	TNNT3	down
